# Supplementary material for: Unsupervised classification of simulated magnetospheric regions
Source: Copernicus journal article supplement (doi:10.5194/angeo-39-861-2021), 2021-10-08
Supplement: Supplementary file [file angeo-39-861-2021-supplement-title-page.pdf › angeo-39-861-2021-supplement-title-page.pdf]

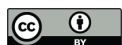

## *Supplement of*

# **Unsupervised classification of simulated magnetospheric regions**

**Maria Elena Innocenti et al.**

*Correspondence to:* Maria Elena Innocenti ([mariaelena.innocenti@rub.de](mailto:mariaelena.innocenti@rub.de))

- [angeo-39-861-2021-supplement-title-page.pdf](#)
- Movies
  - [sigma1.avi](#)
  - [sigma3.avi](#)
  - [sigma6.avi](#)

The copyright of individual parts of the supplement might differ from the article licence.
